# Supplementary material for: Wnt inhibitory factor 1 is epigenetically silenced in human osteosarcoma, and targeted disruption accelerates osteosarcomagenesis in mice
Source: JCI journal article supplement (doi:10.1172/jci37175), 2009-03-19

## SUPPLEMENTAL FIGURE LEGENDS

**Supplemental Figure 1.** dAc and Wif1 regulate osteoblast differentiation in vitro. . A: RT-PCR confirmation of changes in Runx2 and OSX expression in a panel of osteosarcoma cell lines following treatment with dAc. B: Normal human bone cells were treated with BMP2 and Vitamin D for 21 days, and 20 µg of protein subject to Western blotting for analysis of Wif1 protein expression. C: Primary human bone-derived osteoblasts were flow sorted using antibodies STRO1 and ALP and semi quantitative RT-PCR analysis carried out to assess transcript levels of Wif1, OC, COL1A1. D: NHB cells and osteosarcoma cell lines were treated in 24 well plates with 2µg/ml of Wif1-GST recombinant protein or equimolar amounts of control GST protein for 16 hr. Cells were lysed, and equal amounts of protein lysates were assayed for ALP activity using a colorimetric kit. Data represent the mean and SEM. Each value represents the mean ± of three separate determinations, expressed as nmole of p-nitrophenyl produced/mg protein/minute.

**Supplemental Figure 2.** A: Right hindlimbs were obtained from 4-7 *Wif1<sup>LacZ/LacZ</sup>* and wildtype male and female mice at 16 ± 1 weeks of age. Data is expressed as means ± S.E.M. Statistically significant differences are depicted by \* P<0.05 (2 way ANOVA analysis of variance). Femoral length and width of femurs determined by X-ray. Histomorphometric analysis of tibial bone structure. Mineralised surface/bone surface (MS/BS), mineral appositional rates (MAR), bone formation rate/bone surface (BFR/BS), trabecular number (Tb.N), trabecular thickness (Tb.Th), trabecular space (Tb.Sp), bone volume/tissue volume (BV/TV), osteoblast number per mm of bone perimeter (Nob/Bpm), and osteoid thickness (O.Th). B: Effect of genotype on expression of osteoblast marker genes. Quantitative RT-PCR examining changes in gene expression in femurs from 8-week-old *Wif1<sup>LacZ/LacZ</sup>* and wildtype mice and MC3T3E1 Wif1 knockdown cells compared to control cells.

A

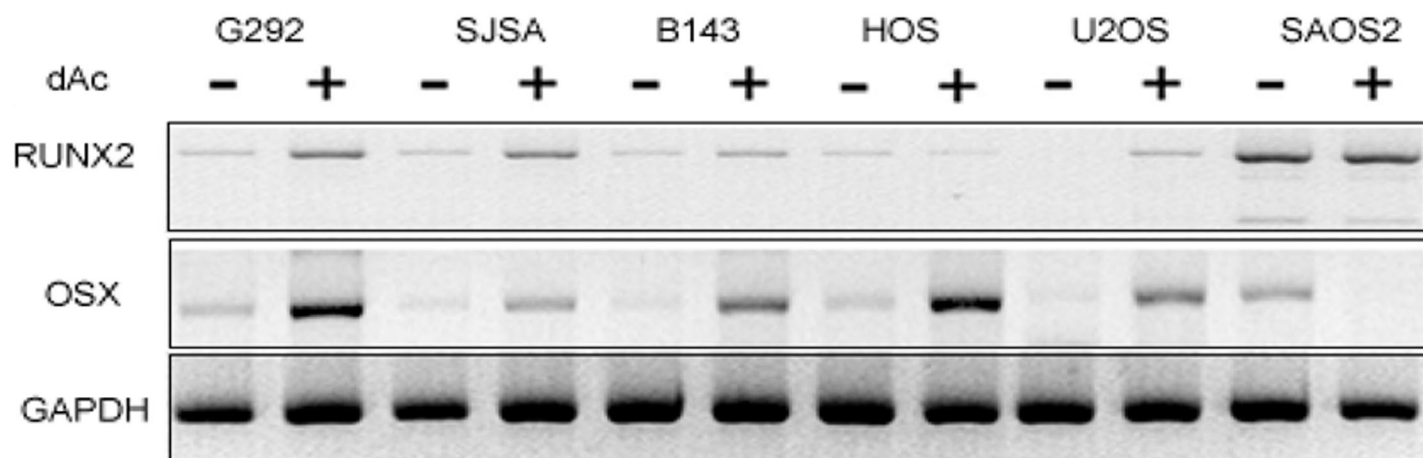

B

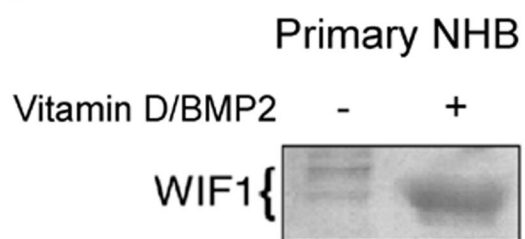

C

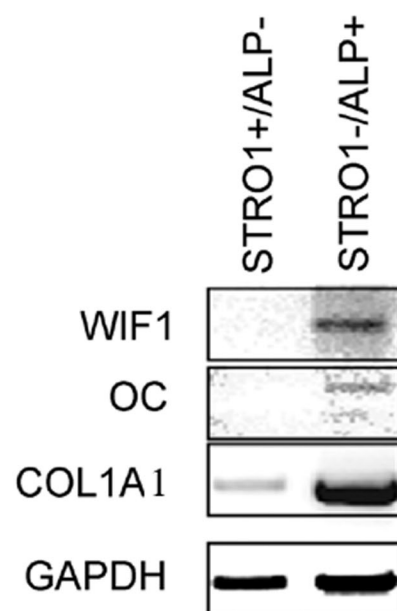

D

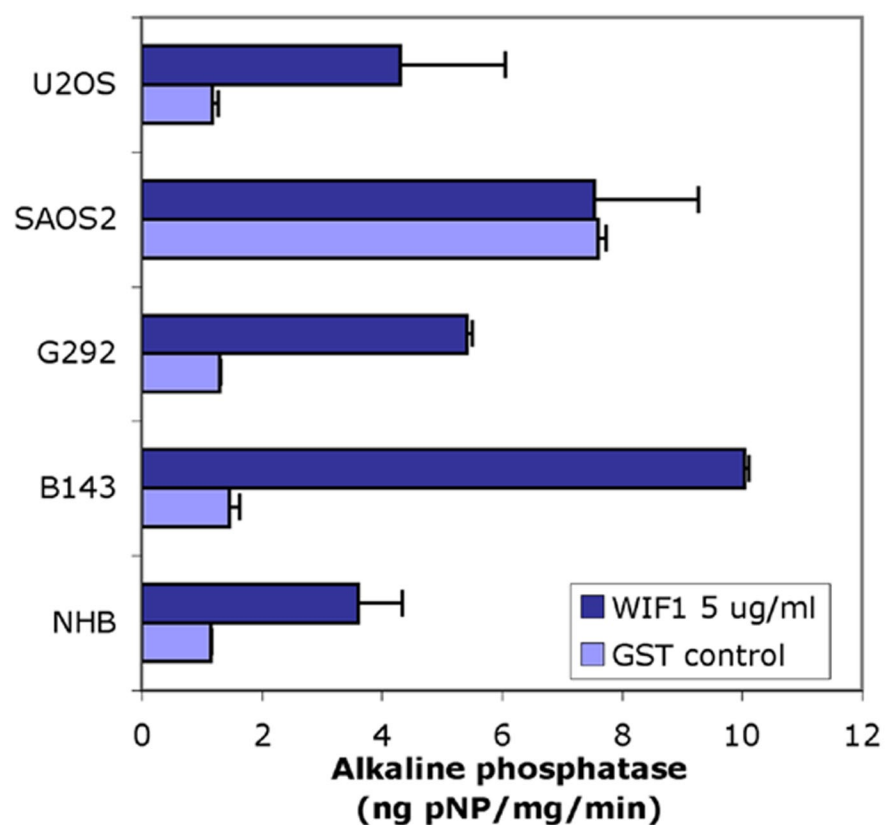

# A

|                     | Male     |          | Female   |          | 2-way ANOVA (p-values) |         |             |
|---------------------|----------|----------|----------|----------|------------------------|---------|-------------|
|                     | Wif1 +/+ | Wif1 -/- | Wif1 +/+ | Wif1 -/- | Genotype               | Gender  | Interaction |
| Femoral length (mm) | 15.4±0.4 | 15.0±0.2 | 14.1±0.3 | 14.7±0.4 | 0.7541                 | 0.0221* | 0.1315      |
| Femoral width (mm)  | 1.4±0.04 | 1.3±0.1  | 1.1±0.1  | 1.2±0.1  | 1.000                  | 0.0652  | 0.3357      |
| MS/BS (%)           | 9.1±1.7  | 11.8±4.4 | 11.5±2.6 | 11±0.7   | 0.7721                 | 0.8331  | 0.6740      |
| MAR (µm/day)        | 1.1±0.17 | 1.4±0.15 | 1.9±0.2  | 1.42±0.2 | 0.6301                 | 0.0407* | 0.0501      |
| BFR/BS (%)          | 37.5±6.8 | 74.4±35  | 75.4±14  | 55.7±7   | 0.7690                 | 0.7404  | 0.1315      |
| Tb.N (/mm)          | 2.8±0.4  | 2.0±0.4  | 2.0±0.4  | 1.7±0.3  | 0.2061                 | 0.2061  | 0.5570      |
| Tb.Th (µm)          | 40.9±5   | 35.5±4   | 33.1±5.2 | 29.3±3   | 0.3303                 | 0.1465  | 0.8634      |
| Tb.Sp (µm)          | 319±42   | 774±231  | 466±63   | 620±146  | 0.1400                 | 0.9859  | 0.4531      |
| BV/TV (%)           | 11.4±2.8 | 8.4±2.5  | 6.2±3.2  | 4.2±1.5  | 0.3769                 | 0.1075  | 0.8579      |
| Nob/BPm             | 3.6±1.6  | 7.4±2.1  | 10.8±3.3 | 16.1±7.5 | 0.8500                 | 0.2614  | 0.8500      |
| O.Th (µm)           | 1.2±0.3  | 1.3±0.3  | 2.0±0.4  | 2.1±0.9  | 0.8387                 | 0.1182  | 1.0000      |

# B

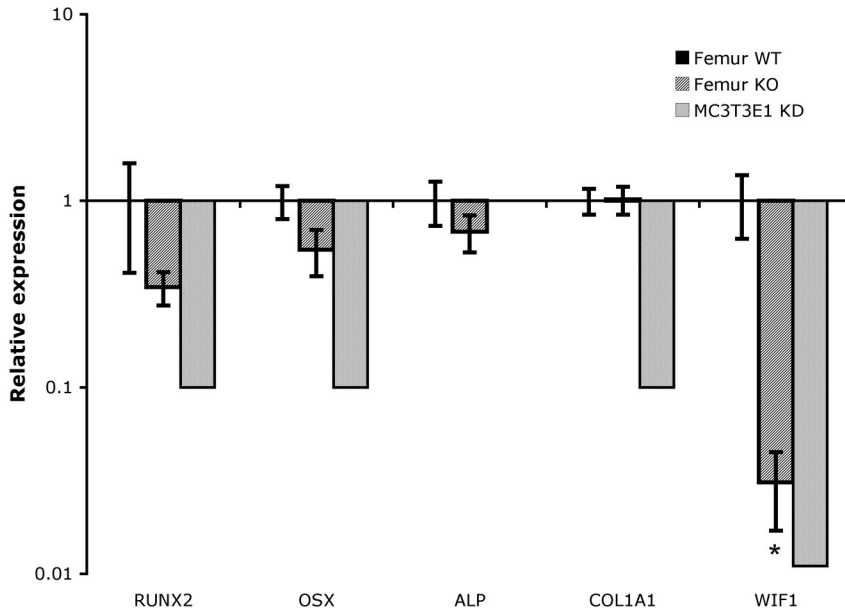

Supplement: sd1 [file 1]
